# Supplementary material for: Clinical insights on outcomes of corticosteroid administration in immune checkpoint inhibitor-induced pneumonitis by retrospective case series analysis
Source: PubMed Central journal article supplement — ESMO Open. 2019 Nov 28;4(6):e000575. doi: 10.1136/esmoopen-2019-000575 (PMC6890388; doi:10.1136/esmoopen-2019-000575), 2019-11-28
Supplement: esmoopen-2019-000575supp001.pdf [file esmoopen-2019-000575supp001.pdf]

**Supplementary Table****Supplementary table 1.** Definition of pneumonitis grades in the NCI-CTCAE version 5.0 (1)

| Grade | Description                                                                                              |
|-------|----------------------------------------------------------------------------------------------------------|
| 1     | Asymptomatic; clinical or diagnostic observations only; intervention not indicated                       |
| 2     | Symptomatic; medical intervention indicated; limiting instrumental ADL                                   |
| 3     | Severe symptoms; limiting self-care ADL; oxygen indicated                                                |
| 4     | Life-threatening respiratory compromise; urgent intervention indicated (e.g., tracheotomy or intubation) |
| 5     | Death                                                                                                    |

Abbreviations: NCI-CTCAE, National Cancer Institute Common Terminology Criteria for Adverse Events; ADL, activities of daily living

## Reference.

1. Wolchok JD, Chiarion-Sileni V, Gonzalez R, et al. Overall Survival with Combined Nivolumab and Ipilimumab in Advanced Melanoma. *N Engl J Med* 2017;377:NEJMoa1709684. doi:10.1056/NEJMoa1709684

**Supplementary table 2.** Definitions of radiographic patterns and extent of ICI-pneumonitis (1, 2)

| <b>Radiographic pattern</b>                | <b>Findings on CT</b>                                                                                                                       |
|--------------------------------------------|---------------------------------------------------------------------------------------------------------------------------------------------|
| Cryptogenic organizing pneumonia (COP)     | Patchy and often migratory consolidation in a subpleural, peribronchial, or bandlike pattern, commonly associated with ground-glass opacity |
| Non-specific interstitial pneumonia (NSIP) | Bilateral ground-glass opacity, irregular reticular opacities with traction bronchiectasis and bronchiolectasis                             |
| Pneumonia not otherwise specified (NOS)    | Findings not satisfying description of other patterns                                                                                       |
| <b>Radiographic extent</b>                 | <b>Findings on CT</b>                                                                                                                       |
| Mild                                       | Pneumonitis involves less than 25% of lung parenchyma                                                                                       |
| Moderate                                   | Pneumonitis involves 25-50% of lung parenchyma                                                                                              |
| Severe                                     | Pneumonitis involves more than 50% of lung parenchyma                                                                                       |

Abbreviations: ICI, immune checkpoint inhibitor; CT, computed tomography

#### Reference.

1. Travis WD, Costabel U, Hansell DM, et al. An official American Thoracic Society/European Respiratory Society statement: Update of the international multidisciplinary classification of the idiopathic interstitial pneumonias. *Am J Respir Crit Care Med* 2013;188:733–48. doi:10.1164/rccm.201308-1483ST
2. Society ATSR. American Thoracic Society American Thoracic Society / European Respiratory Society International Multidisciplinary Consensus Classification of the Idiopathic Interstitial Pneumonias. *Am J Respir Crit Care Med* 2002;166:518–626. doi:10.1183/09031936.02.00492002

**Supplementary table 3.** Incidence of ICI-pneumonitis by each cancer type

| Cancer                                | Number of patients included in screening | Number of patients having ICI-pneumonitis | Incidence (%) |
|---------------------------------------|------------------------------------------|-------------------------------------------|---------------|
| Non-small cell lung cancer            | 219                                      | 8                                         | 3.65          |
| Head-and-neck squamous cell carcinoma | 57                                       | 2                                         | 3.51          |
| Urothelial cell carcinoma             | 50                                       | 1                                         | 2.00          |
| Biliary cancer                        | 27                                       | 1                                         | 3.70          |
| Colorectal cancer                     | 23                                       | 1                                         | 4.35          |
| Lymphoma                              | 6                                        | 1                                         | 16.67         |
| Esophageal cancer                     | 16                                       | 1                                         | 6.25          |
| Renal cell carcinoma                  | 41                                       | 1                                         | 2.44          |
| Advanced gastric cancer               | 100                                      | 0                                         | 0             |
| Melanoma                              | 51                                       | 0                                         | 0             |
| Breast cancer                         | 45                                       | 0                                         | 0             |
| Small cell lung cancer                | 20                                       | 0                                         | 0             |
| Thyroid cancer                        | 14                                       | 0                                         | 0             |
| Others <sup>+</sup>                   | 37                                       | 0                                         | 0             |

+: Other cancer types include pancreatic cancer, hepatocellular carcinoma, glioblastoma multiforme, prostate cancer, uterine cancer, ovarian cancer, merkel cell carcinoma, renal squamous cell carcinoma and metastasis of unknown origin.

**Supplementary table 4.** Clinical features of pneumonitis at initial recognition

|                                              | <b>No. of patients (%)</b> |
|----------------------------------------------|----------------------------|
| <b>Symptoms</b>                              |                            |
| <b>Cough</b>                                 | 3 (19)                     |
| <b>Sputum</b>                                | 4 (25)                     |
| <b>Dyspnea</b>                               | 4 (25)                     |
| <b>Fever</b>                                 | 0 (0)                      |
| <b>Grade according to NCI-CTCAE</b>          |                            |
| <b>Grade 1</b>                               | 9 (56)                     |
| <b>Grade 2</b>                               | 4 (25)                     |
| <b>Grade 3</b>                               | 3 (19)                     |
| <b>Time to onset from initiation of ICIs</b> |                            |
| <b>≤ 3 months</b>                            | 6 (38)                     |
| <b>&gt; 3 months</b>                         | 10 (63)                    |
| <b>Other accompanying irAE</b>               |                            |
| <b>None</b>                                  | 8 (50)                     |
| <b>Thyroiditis</b>                           | 5 (31)                     |
| <b>Keratitis</b>                             | 1 (6)                      |
| <b>Uveitis</b>                               | 1 (6)                      |
| <b>Arthritis</b>                             | 2 (13)                     |
| <b>Skin rash</b>                             | 1 (6)                      |

Abbreviations: NCI-CTCAE, National Cancer Institute Common Terminology Criteria for Adverse Events; ICI, immune checkpoint inhibitor; irAE, immune-related adverse event

**Supplementary table 5.** Radiological patterns and grade of pneumonitis

| <b>Grade</b>    | <b>1</b> | <b>2</b> | <b>3</b> |
|-----------------|----------|----------|----------|
| <b>Pattern</b>  |          |          |          |
| <b>COP</b>      | 4        | 3        | 0        |
| <b>NSIP</b>     | 2        | 0        | 1        |
| <b>NOS</b>      | 3        | 1        | 2        |
| <b>Extent</b>   |          |          |          |
| <b>Mild</b>     | 7        | 2        | 0        |
| <b>Moderate</b> | 2        | 2        | 3        |

Abbreviations: COP, cryptogenic organizing pneumonia; NSIP, non-specific interstitial pneumonia; NOS, pneumonia not otherwise specified
